# Supplementary material for: Photo tuning of thiophene-2,5-dicarbohydrazide derivatives for their photoalignment ability-molecular modelling studies
Source: Royal Society of Chemistry journal article supplement (doi:10.1039/c5ra12772f), 2015-01-01
Supplement: c5ra12772f1.pdf [file c5ra12772f1.pdf]

## Photo tuning of thiophene-2, 5-dicarbo hydrazide derivatives for their photoalignment ability-Molecular modelling studies

Gurumurthy Hegde <sup>a\*</sup>, A. A. Murausky, <sup>b</sup> A. A. Murauski, <sup>b</sup> I. N. Kukhta, <sup>b</sup> A. V. Adhikari, <sup>c</sup> L. Komitov, <sup>d</sup>

### Supplementary file

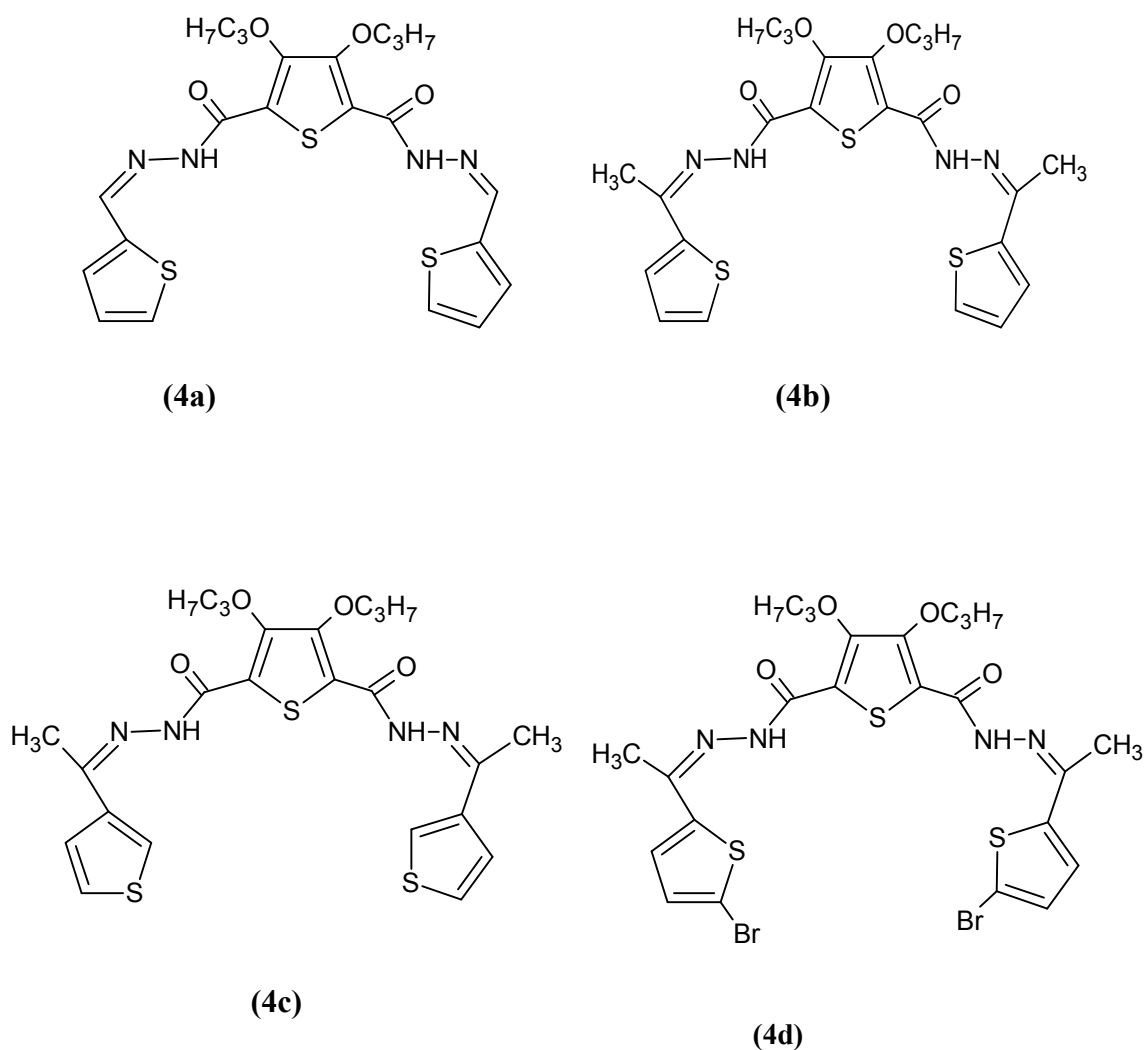

**Figure S1.** Structure of compounds 4a-4d, a bis-hydrazides of thiophenes.
